# Supplementary material for: Dual pH and ultrasound responsive curcumin loaded g-C3N4/Ba(OH)2 nanocarrier for chemo-photodynamic therapy
Source: Royal Society of Chemistry journal article supplement (doi:10.1039/d4nj02426e), 2024-01-01
Supplement: d4nj02426e1.pdf [file d4nj02426e1.pdf]

**Dual pH and Ultrasound responsive Curcumin loaded g-C<sub>3</sub>N<sub>4</sub>/Ba(OH)<sub>2</sub> nanocarrier for Chemo-Photodynamic Therapy**

Saumya [a], Faqua Zarreen [b]#, Masood Nadeem [b]#, Srinivas voddumalla [c], Moshahid A Rizvi [b], Bhavani P. Nenavathu \*[a]

[a]Department of Applied Sciences and Humanities, Indira Gandhi Delhi Technical University for Women, Kashmere Gate, Delhi, 110006, India

[b] Department of Biosciences, Jamia Millia Islamia University, 110025, New Delhi, India

[c] NTO large molecules & CMO, Drug substance Singapore, Novartis Singapore pharmaceutical manufacturing Pvt. Ltd. Singapore 636986

\*E-mail: [bhavaniprasadnaik@igdtuw.ac.in](mailto:bhavaniprasadnaik@igdtuw.ac.in)

# The authors have contributed equally to this work

### **Supplementary figures:**

**Fig. S1.** Calibration curve of curcumin.

**Fig. S2.** Zeta potential value of curcumin-loaded FA-GCNB NC at pH 5.4

**Fig. S3.** Zeta potential value of curcumin-loaded FA-GCNB NC at pH 7.4.

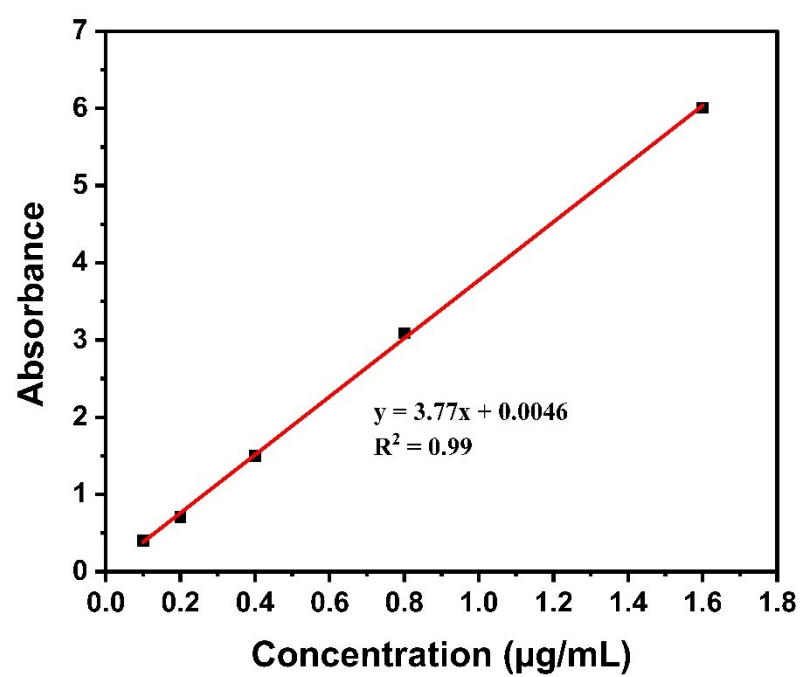

**Fig. S1.** Standard curve for curcumin at absorbance 423 nm

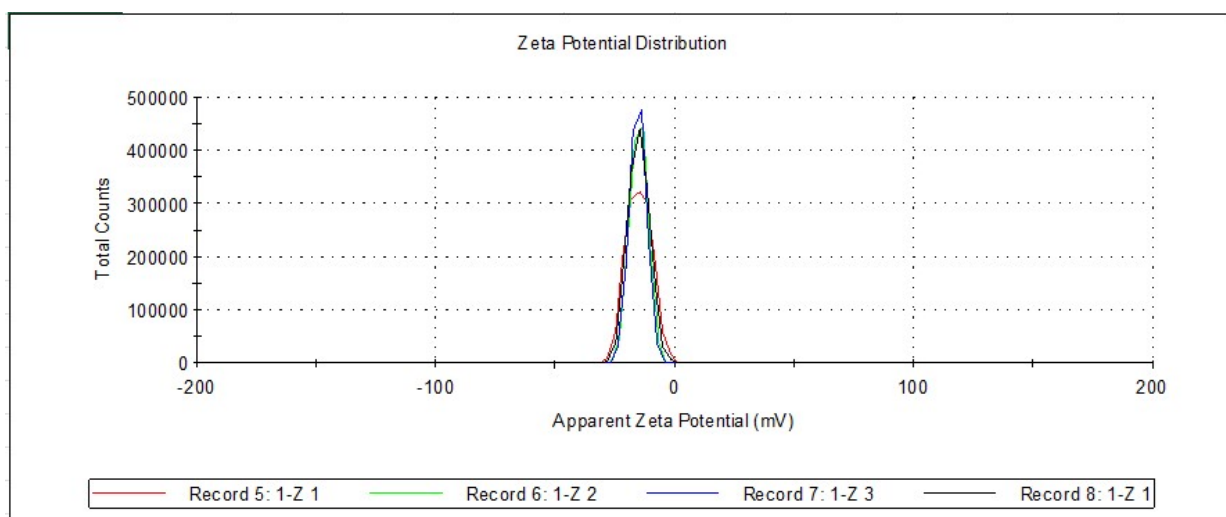

**Fig. S2.** Zeta's potential value of curcumin-loaded FA-GCNB NC at pH 5.4

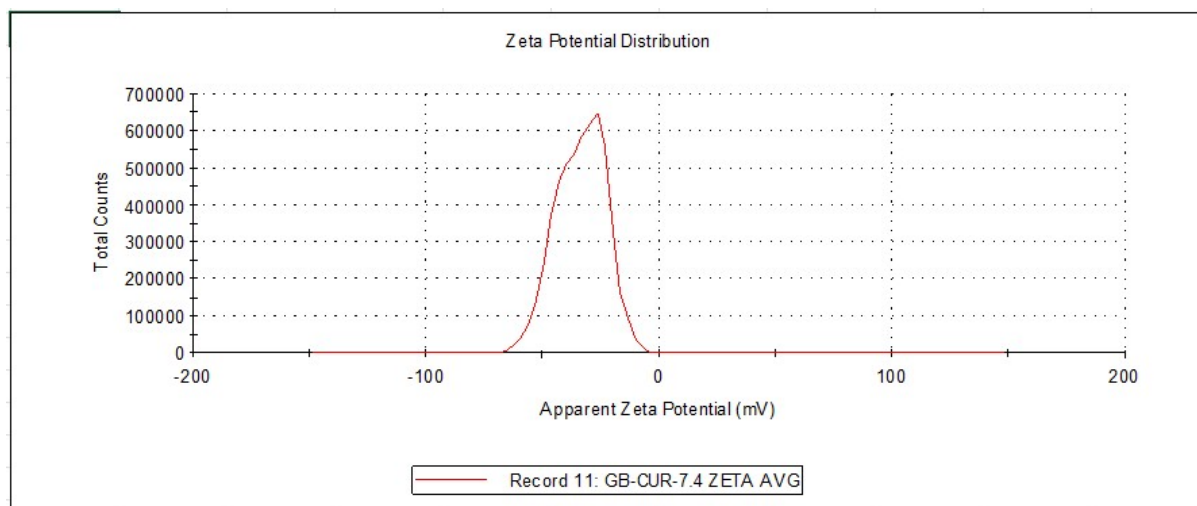

**Fig. S3.** Zeta's potential value of curcumin-loaded FA-GCNB NC at pH 7.4.
